# Supplementary material
Source: publisher figshare collection journal article supplement (https://acs.figshare.com/ndownloader/files/4559086)
Supplement: Supplementary file 1 [file 4559086]

## SUPPORTING INFORMATION

### Insights into the Structural Basis of N2 and O6 Substituted Guanine Derivatives as Cyclin-Dependent Kinase 2 (CDK2) Inhibitors: Prediction of the Binding Modes and potency of the inhibitors by Docking and ONIOM Calculation

Jans H. Alzate-Morales\*, Julio Caballero, Ariela Vergara and Fernando D. González Nilo

**Figure S11.** Plot of the AutoDock3 docked energy versus the Log ( $10^6/IC_{50}$ ) for the set of compounds studied.

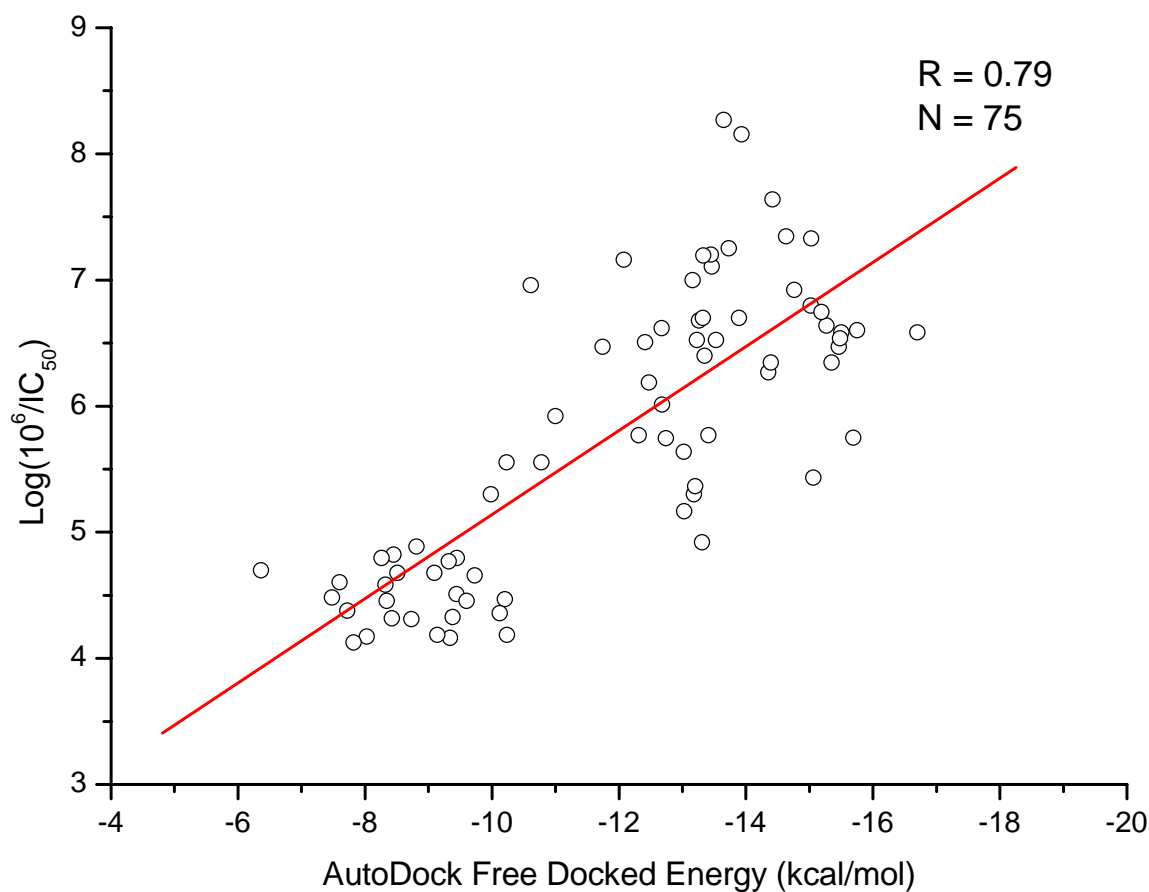

Statistical data for linear regression equation:

$$\mathbf{Log(10^6/IC_{50}) = 1.8056 - 0.33 \times \Delta G_{AutoDock3} (kcal/mol)} \quad (1)$$

$$\mathbf{N = 75 \qquad r = 0.790 \qquad r^2 = 0.619 \qquad F_{(1, 73)} = 121.44 \qquad p < 10^{-4}}$$
